# Supplementary material
Source: publisher figshare collection journal article supplement (https://acs.figshare.com/ndownloader/files/5763270)
Supplement: Supplementary file 1 [file 5763270]

## Total Syntheses of Depsipeptide Elastase Inhibitors YM-47141 and YM-47142 using Ylide Protection and Coupling Methods.

### Supplementary Information

Harry H. Wasserman,\* Jyun-Hung Chen and Mingde Xia

Department of Chemistry, Yale University, P.O. Box 208107, New Haven, CT 06520-8107 USA

#### *N*-(2-Bromoacetyl)-Leu-OBn (2).

A solution of leucine benzyl ester (15.047g, 68 mmol) in 400 mL of  $\text{CH}_2\text{Cl}_2$  was cooled to 0 °C in an ice-water bath and sequentially treated with bromoacetic acid (10.421g, 75 mmol), DMAP (415 mg, 3.4 mmol) and DCC (14.475 g, 75 mmol). A white precipitate of dicyclohexylurea formed immediately upon the addition of DCC. The reaction mixture was stirred at 0 °C for 1 h and diluted with  $\text{Et}_2\text{O}$  (500 mL). The white precipitate was removed by filtration. The filtrate was concentrated *in vacuo*. Flash chromatography ( $\text{SiO}_2$ , 10 x 30 cm, 1:7 to 1:4 EtOAc-hexane gradient elution) gave the desired product which was further purified by recrystallization from EtOAc-hexane to provide product 21.429 g (92%) as white needles: mp 91.5-92.5 °C;  $[\alpha]_{\text{D}}^{20} = -3.86$  (C 10.0,  $\text{CHCl}_3$ ); Rf 0.35 ( $\text{SiO}_2$ , EtOAc:hexane = 1:4);  $^1\text{H}$  NMR ( $\text{CDCl}_3$ , 500 MHz):  $\delta$  7.40-7.30 (m, 5 H), 6.81 (d, J = 7.6 Hz, 1 H), 5.19 (d, J = 12.3 Hz, 1 H), 5.16 (d, J = 12.3 Hz, 1 H), 4.66 (dt, J = 8.5, 5.2 Hz, 1 H), 3.88 (s, 2 H), 1.73-1.57 (m, 3 H), 0.93 (d, J = 6.3 Hz, 3 H), 0.92 (d, J = 6.3 Hz, 3 H);  $^{13}\text{C}$  NMR ( $\text{CDCl}_3$ , 125 MHz):  $\delta$  172.1, 165.2, 135.1, 128.6, 128.5, 128.2, 67.2, 51.5, 41.3, 28.8, 24.8, 22.7, 21.9; IR (KBr)  $\nu_{\text{max}}$  3069, 2964, 1742, 1649, 1550, 1189, 1153  $\text{cm}^{-1}$ ; HRMS: calcd for  $(\text{M}+\text{H})^+$ , 342.0705, found 342.0715. Anal. calcd for  $\text{C}_{15}\text{H}_{20}\text{BrNO}_3$ : C, 52.64; H, 5.89; N, 4.09. Found: C, 52.84; H, 5.99; N, 4.07.

#### [*N*-(2-Triphenylphosphoniumacetyl)-Leu-OBn] bromide (3).

*N*-(2-Bromoacetyl)-Leu-OBn (2) (10.715 g, 31.3 mmol) was dissolved in a 1:3 ratio mixture of THF- $\text{Et}_2\text{O}$  (160 mL) and 16.424 g of triphenylphosphine (62.6 mmol) was added to this solution in one portion. After 1 h, the clear reaction mixture started to turn cloudy. The reaction mixture was

stirred at 23 °C and monitored by TLC. After 3 days, the reaction mixture became a thick white suspension, and TLC showed that the bromoacetyl compound (2) had been consumed. The white precipitate of the ylide salt (3) was collected by filtration. The white filtered cake was further rinsed with Et<sub>2</sub>O (200 mL) and hexane (200 mL) to remove residual triphenylphosphine. The white precipitate was dried on a vacuum pump and provided the ylide salt (3) 18.320 g (97%).mp 150-151 °C;  $[\alpha]_D^{20} = -29.72$  (C 5.0, CHCl<sub>3</sub>); <sup>1</sup>H NMR (CDCl<sub>3</sub>, 500 MHz) δ 9.60 (d, J = 6.6 Hz, 1 H), 7.84-7.56 (m, 15 H), 7.33-7.27 (m, 5 H), 5.35 (dd, J = 14.3 Hz, J<sub>P-H</sub> = 15.6 Hz, 1 H), 5.08 (d, J = 12.5 Hz, 1 H), 5.05 (dd, J = 15.0 Hz, J<sub>P-H</sub> = 15.1 Hz, 1 H), 5.04 (d, J = 12.5 Hz, 1 H), 4.26 (dt, J = 10.3, 5.8 Hz, 1 H), 1.85-1.50 (m, 3H), 0.88 (d, J = 6.5 Hz, 3 H), 0.74 (d, J = 6.5 Hz, 3 H); <sup>13</sup>C NMR (CDCl<sub>3</sub>, 125 MHz), δ 171.3, 162.7 (d, J<sub>C-P</sub> = 5.0 Hz), 135.8, 134.8, 134.0, 133.9, 130.0 (d, J<sub>C-P</sub> = 14.0 Hz), 128.1 (d, J<sub>C-P</sub> = 64.0 Hz), 127.9, 118.4 (d, J<sub>C-P</sub> = 88.0 Hz), 66.4, 52.3, 39.3, 31.9 (d, J<sub>C-P</sub> = 56.0 Hz), 24.6, 22.7, 21.4; IR (KBr) ν max 3168, 3016, 2955, 1749, 1735, 1667, 1549, 1535, 1439 cm<sup>-1</sup>. HRMS calcd for (M-Br): 524.2355. Found: 524.2355. Anal. calcd for C<sub>33</sub>H<sub>35</sub>BrNO<sub>3</sub>P: C, 65.56; H, 5.84; N, 2.32. Found: C, 65.37; H, 5.82; N, 2.33.

[(4*S*)-4-[(tert-Butoxycarbonyl)amino]-6-methyl-3-oxo-2-(triphenylphosphoranylidene)-heptanoyl]-Leu-OBn (4).

In a 100 mL round-bottomed flask, 7.76 g of the ylide salt (3) (12.8 mmol) was dissolved in 30 mL of CH<sub>2</sub>Cl<sub>2</sub> and subsequently treated with 18 mL of triethylamine (129 mmol). The resulting mixture was stirred at 23 °C under N<sub>2</sub> atmosphere for 1 h. In another 100 mL round-bottomed flask, a solution of *N*-Boc-L-Leu-OH (4.453 g, 19.3 mmol) in 30 mL of CH<sub>2</sub>Cl<sub>2</sub> was treated with 3.20 g of CDI (19.3 mmol). This solution was stirred at 23 °C for 15 min. The *in situ*-generated ylide was then transferred into the CDI-activated *N*-Boc-L-Leu-OH solution through cannula. The combined mixture was stirred at 23 °C for an additional 24 h. The reaction mixture was diluted with CH<sub>2</sub>Cl<sub>2</sub> (200 mL), washed with water (150 mL) and saturated aqueous NaCl solution (150 mL). The organic phase was dried (MgSO<sub>4</sub>), filtered, and concentrated *in vacuo*. Flash chromatography (SiO<sub>2</sub>, 8 x 35 cm, Et<sub>2</sub>O:hexane = 3:1 elution) gave product 9.083 g (96%) as a white foam:  $[\alpha]_D^{20} = -13.85$  (C 10.0, CHCl<sub>3</sub>); R<sub>f</sub> 0.24 (SiO<sub>2</sub>, Et<sub>2</sub>O:hexane = 3:1).

$^1\text{H}$  NMR (DMSO- $d_6$ , 500 MHz)  $\delta$  9.29 (br, s, 1 H), 7.60-7.26 (m, 20 H), 6.91 (br, s, 1 H), 5.09 (d,  $J$  = 12.6 Hz, 1 H), 5.05 (d,  $J$  = 12.6 Hz, 1 H), 4.90 (br, s, 1 H), 4.19 (ddd,  $J$  = 10.5, 7.0, 4.5 Hz, 1 H), 1.72-1.69 (m, 1 H), 1.68-1.65 (m, 1 H), 1.47 (s, 9 H), 1.35-1.11 (m, 4 H), 0.88 (d,  $J$  = 6.5 Hz, 3 H), 0.75 (d,  $J$  = 6.5 Hz, 3 H), 0.70 (d,  $J$  = 6.5 Hz, 3 H), 0.61 (br, s, 3 H).  $^{13}\text{C}$  NMR (DMSO- $d_6$ , 125 MHz)  $\delta$  188.4, 172.8, 166.2, 156.5, 136.0, 132.7 (d,  $J_{\text{c-p}}$  = 10.0 Hz), 131.6, 128.4, 128.3, 127.9, 127.6, 126.2 (d,  $J_{\text{c-p}}$  = 92.3 Hz), 78.2, 73.2 (d,  $J_{\text{c-p}}$  = 110.5 Hz), 65.6, 51.7, 50.8, 40.6, 40.2, 28.2, 24.3, 24.0, 22.8, 22.7, 22.5, 21.1; IR (KBr)  $\nu$  max 3431, 3250, 2955, 1743, 1689, 1625, 1523, 1160  $\text{cm}^{-1}$ ; HRMS: calcd for  $(\text{M}+\text{H})^+$  737.3720. Found: 737.3727. Anal. calcd for  $\text{C}_{44}\text{H}_{53}\text{N}_2\text{O}_6\text{P}$ : C, 71.72; H, 7.25, N, 3.80; Found: C, 71.75; H, 7.27; N, 3.86.

[(4*R*)-4-[(tert-Butoxycarbonyl)amino]-6-methyl-3-oxo-2-(triphenylphosphoranylidene)-heptanoyl]-Leu-OBn (D-Leucine Isomer of 4)

The ylide salt (3) (2.95 g, 4.88 mmol) was dissolved in 15 mL of  $\text{CH}_2\text{Cl}_2$  and then treated with  $\text{Et}_3\text{N}$  (6.8 mL, 48.8 mmol). The mixture was stirred under  $\text{N}_2$  for 1 h. In another flask, Boc-D-Leu-OH (1.75 g, 7.56 mmol) was dissolved in 10 mL of  $\text{CH}_2\text{Cl}_2$  and was treated with CDI (1.25 g, 7.56 mmol). Then the ylide was added to CDI-activated Boc-D-Leu-OH solution. The resulting mixture was stirred for 24 h and then was washed with water. The organic layer was dried over  $\text{Na}_2\text{SO}_4$ . After the solvent was evaporated *in vacuo*, the residue was flash chromatographed ( $\text{CH}_3\text{CO}_2\text{Et}/\text{CHCl}_3$  = 1/3) to give 3.2 g (89%) of expected product as a white foam.  $[\alpha]_{\text{D}}^{20}$  = -22.33 (C 7.0,  $\text{CHCl}_3$ ).

$^1\text{H}$  NMR ( $\text{CDCl}_3$ , 300 MHz)  $\delta$  8.71 (br, s, 1 H), 7.70-7.29 (m, 20 H), 7.09 (d,  $J$  = 7.3 Hz, 1 H), 5.16 (m, 1 H), 5.09 (d,  $J$  = 12.7 Hz, 1 H), 5.03 (d,  $J$  = 12.7 Hz, 1 H), 4.41 (m, 1 H), 1.69 (m, 2 H), 1.55 (m, 2 H), 1.49 (s, 9 H), 1.34 (m, 2 H), 0.93 (d,  $J$  = 6.4, 3 H), 0.89 (d,  $J$  = 5.9 Hz, 3 H), 0.79 (d,  $J$  = 5.7 Hz, 3 H), 0.65 (br, s, 3 H).  $^{13}\text{C}$  ( $\text{CDCl}_3$ , 75 Hz)  $\delta$  188.9, 173.8, 167.5, 156.8, 136.3, 133.3 (d,  $J_{\text{c-p}}$  = 10.0 Hz), 131.5, 128.5, 128.4, 127.9, 127.7, 126.3 (d,  $J_{\text{c-p}}$  = 93.6 Hz), 78.9, 73.9 (d,  $J_{\text{c-p}}$  = 107.6 Hz), 66.1, 51.9, 50.9, 41.0, 40.6, 28.4, 25.1, 24.6, 23.2, 22.7, 22.0, 21.5. IR (KBr)  $\nu$  max 3435, 3274, 2959, 1743, 1687, 1625, 1512  $\text{cm}^{-1}$ ; HRMS: calcd for  $(\text{M}+\text{H})^+$  737.3719, found 737.3727. Anal. calcd for  $\text{C}_{44}\text{H}_{53}\text{N}_2\text{O}_6\text{P}$ : C, 71.72; H, 7.25; N, 3.80; Found: C, 71.50; H, 7.24; N, 3.88.

## Ozonolysis of Ylide 4:

The ylide 4 (0.51 g, 0.693 mmol) was dissolved in 20 mL of  $\text{CH}_2\text{Cl}_2$ , ozonized at  $-78^\circ\text{C}$  for 7 min, and the solution was then purged with  $\text{N}_2$  for 10 min. After the solvent was evaporated *in vacuo*, the residue was flash-chromatographed ( $\text{CH}_3\text{CO}_2\text{Et}$ /hexanes = 1/2) to give 0.274 g (79%) of hemihydrate.  $[\alpha]_D^{20} = -22.46$  (C 5.0,  $\text{CHCl}_3$ ).

$^1\text{H}$  NMR ( $\text{DMSO}-d_6$ , 300 MHz)  $\delta$  7.92 (d,  $J = 8.3$  Hz, 1 H), 7.82 (s, 1 H), 7.34 (m, 10 H), 7.12 (d,  $J = 6.7$  Hz, 2 H), 6.90 (d,  $J = 8.5$  Hz, 1 H), 6.64 (s, 1 H), 5.10 (s, 4 H), 4.73 (m, 1 H), 4.34 (m, 3 H), 1.58 (m, 12 H), 1.33 (s, 18 H), 0.82 (m, 24 H). IR (KBr) max 3370, 2965, 1752, 1675,  $1545\text{ cm}^{-1}$ ; HRMS calcd for  $(\text{M}+\text{Na})^+$  1021.5361. Found: 1021.5366.

## Ozonolysis of D-Leucine Isomer of 4:

The D-leucine isomer of 4 (0.28 g, 0.38 mmol) in 10 mL of  $\text{CH}_2\text{Cl}_2$  was ozonized at  $-78^\circ\text{C}$  for 3 min and the solution was then purged with  $\text{N}_2$  for 5 min. After the solvent was evaporated *in vacuo*, the residue was flash-chromatographed ( $\text{CH}_3\text{CO}_2\text{Et}$ : hexanes = 1:2) to give 0.135 g (71%) of hemihydrate.  $[\alpha]_D^{20} = +3.9$  (C 5.0,  $\text{CHCl}_3$ )

$^1\text{H}$  NMR ( $\text{CDCl}_3$ , 300 MHz)  $\delta$  7.37-7.10 (m, 14 H), 5.97 (s, 1 H), 5.84 (s, 1 H), 5.18 (m, 4 H), 4.63 (m, 4 H), 1.65 (m, 12 H), 0.92 (s, 18 H), 0.87 (m, 24 H). IR (KBr)  $\nu$  max 3423, 3021, 2975,  $1733$ ,  $1702$ ,  $1687$ ,  $1496\text{ cm}^{-1}$ . HRMS calcd for  $(\text{M}+\text{Na})^+$  1021.5361. Found: 1021.5365.

*N*-Boc-Thr[*N*-Fmoc-D-Ala]-OBn (Benzyl Ester of 5)

A suspension of *N*-Fmoc-D-Ala-OH (10.341 g, 33.2 mmol) in 200 mL of  $\text{CH}_2\text{Cl}_2$  was added to 5.485 g of 1,1'-carbonyldiimidazole (33.2 mmol) in two portions. The resulting mixture immediately turned clear and  $\text{CO}_2$  vigorously effervesced. After 15 min, a solution of *N*-Boc-Thr-OBn (25.450 g, 82.3 mmol) in 200 mL of  $\text{CH}_2\text{Cl}_2$  was added through a cannula. The reaction mixture was stirred at  $23^\circ\text{C}$  for 20 h under  $\text{N}_2$  atmosphere and then was put through a short silica gel column (8 x 12 cm) directly and rinsed with 1.5 liter of 40% EtOAc-hexane. The fractions containing the product and unreacted *N*-Boc-Thr-OBn were concentrated. The residue was purified by flash chromatography

(SiO<sub>2</sub>, 8 x 20 cm, 1:6 to 1:4 ratio of EtOAc-hexane gradient elution) to give the desired product 15.973 g (80%) along with recovered *N*-Boc-Thr-OBn (16.562 g). The product was further purified to yield white needles by recrystallization from Et<sub>2</sub>O-hexane mixture: mp. 125.5 °C - 126.5 °C;  $[\alpha]_D^{20} = +14.65$  (C 11.0, CHCl<sub>3</sub>); R<sub>f</sub> 0.53 (EtOAc: hexane = 1:2); <sup>1</sup>H NMR (DMSO-D<sub>6</sub>, 500 MHz)  $\delta$  7.88 (d, J = 7.6 Hz, 2 H), 7.73 - 7.68 (m, 3 H), 7.44-7.32 (m, 9 H), 7.25 (d, J = 9.2 Hz, 1 H), 5.24 (dq, J = 6.5, 3.2 Hz, 1 H), 5.10 (d, J = 12.5 Hz, 1 H), 5.06 (d, J = 12.5 Hz, 1 H), 4.39 (dd, J = 9.2, 3.2 Hz, 1 H), 4.29 (d, J = 6.8 Hz, 2 H), 4.21 (t, J = 6.8 Hz, 1 H), 4.03 (dq, J = 7.5, 7.2 Hz, 1 H), 1.37 (s, 9 H), 1.18 (d, 3 H, J = 7.5 Hz), 1.16 (d, 3 H, J = 6.5 Hz); <sup>13</sup>C NMR (DMSO-d<sub>6</sub>, 125 MHz)  $\delta$  171.9, 169.6, 155.9, 155.8, 143.8, 143.7, 140.7, 135.6, 128.3, 128.1, 127.8, 127.6, 127.0, 125.2, 120.1, 78.6, 70.2, 66.4, 65.6, 57.0, 49.4, 46.6, 28.1, 16.9, 16.4; IR (KBr)  $\nu$  max 3396, 3339, 2797, 1750, 1714, 1513, 1216, 1165 cm<sup>-1</sup>; HRMS calcd for (M+H)<sup>+</sup>: 603.2706. Found: 603.2705. Anal. calcd for C<sub>34</sub>H<sub>38</sub>N<sub>2</sub>O<sub>8</sub>: C, 67.76; H, 6.35; N, 4.65. Found: C, 67.78; H, 6.33; N, 4.61.

*N*-Boc-Thr[*N*-Fmoc-D-Ala]-[(4*S*)-4-aminio-3-oxo-2-triphenylphosphoranylidene-heptanoyl]-Leu-OBn (6)

A solution of *N*-Boc-Thr[*N*-Fmoc-D-Ala]-OBn (benzyl ester of 5) (4.632 g, 7.7 mmol) in 80 mL of CH<sub>2</sub>Cl<sub>2</sub> was treated with 10% Pd-C (460 mg) and the resulting black suspension was stirred at 23 °C under H<sub>2</sub> atmosphere (balloon) for 14 h. The catalyst was removed by filtration through a short pad of celite and rinsed with additional 300 mL of CH<sub>2</sub>Cl<sub>2</sub>. The filtrate was concentrated to give crude acid 5 which was used directly in the next reaction without further purification.

In another 100 mL round-bottomed flask, 5.83 g of (4) (7.91 mmol) was treated with 15 mL of 3M HCl-EtOAc. The mixture was stirred at 23 °C for 30 min. EtOAc and excess HCl was removed *in vacuo*. The residual HCl was further removed by adding Et<sub>2</sub>O (30 mL) to the hydrochloride salt, followed by its removal *in vacuo*. After this procedure was repeated twice, the hydrochloride salt thus obtained was used in the following reaction immediately without further purification.

A solution of acid and the hydrochloride salt in 60 mL of CH<sub>2</sub>Cl<sub>2</sub> was cooled to 0 °C and sequentially treated with HOBt (1.029 g, 7.6 mmol), Et<sub>3</sub>N (1.54 g, 15.2 mmol), and EDCI (1.460 g, 7.6 mmol). The reaction mixture was stirred at 0 °C for 2 h, slowly warmed to 23 °C and stirred for an additional

20 h. The mixture was poured into H<sub>2</sub>O (150 mL) and extracted with EtOAc (3 x 200 mL). The combined organic phases were washed with saturated aqueous NaCl solution (200 mL), dried (MgSO<sub>4</sub>), filtered and concentrated *in vacuo*. Flash chromatography (SiO<sub>2</sub>, 8 x 18 cm, 40-60% EtOAc/hexane gradient elution) of the crude product afforded tetradepsipeptide (6) 6.809 g (78% as a white foam): :  $[\alpha]_D^{20} = -1.38$  (C 10.0, CHCl<sub>3</sub>); <sup>1</sup>H NMR (DMSO-d<sub>6</sub>, 500 MHz)  $\delta$  9.06 (br, s, 1 H), 8.11 (br, s, 1 H), 7.88 (d, J = 7.5 Hz, 2 H), 7.78-7.69 (m, 3 H), 7.59-7.27 (m, 24 H), 6.95 (d, J = 9.1 Hz, 1 H), 5.15-4.98 (m, 4 H), 4.32-4.21 (m, 5 H), 4.04 (t, J = 7.2 Hz, 1 H), 1.59-1.41 (m, 4 H), 1.36 (s, 9 H), 1.26 (d, J = 7.1 Hz, 3 H), 1.23-1.20 (m, 2 H), 1.12 (d, J = 5.4 Hz, 3 H), 0.85 (d, J = 6.4 Hz, 3 H), 0.71 (d, J = 5.9 Hz, 3 H), 0.62 (d, J = 6.1 Hz, 3 H), 0.58 (br, s, 3 H); <sup>13</sup>C (DMSO-d<sub>6</sub>, 125 MHz)  $\delta$  186.6, 172.7, 172.3, 172.2, 169.6, 168.7, 166.0, 155.9, 155.2, 143.8, 143.7, 140.7, 135.9, 132.8 (d, J<sub>c-p</sub> = 9.5 Hz), 131.6, 128.3, 127.9, 127.8, 127.6, 127.2, 125.9 (d, J<sub>c-p</sub> = 92.1 Hz), 125.2, 120.1, 78.4, 74.0 (d, J<sub>c-p</sub> = 105.5 Hz), 71.2, 65.7, 65.6, 57.7, 51.4, 50.7, 49.4, 46.6, 40.9, 40.7, 28.1, 24.2, 23.8, 22.9, 22.7, 22.2, 22.0, 21.3, 16.9; IR (KBr)  $\nu$  max 3270, 3061, 2956, 1722, 1659, 1515, 1163 cm<sup>-1</sup>; HRMS calcd for (M+H)<sup>+</sup> 1131.5248. Found 1131.5251. Anal. calcd for C<sub>66</sub>H<sub>75</sub>N<sub>4</sub>O<sub>11</sub>P: C, 70.07; H, 6.68; N, 4.95. Found: C, 69.87; H, 6.88; N, 4.93.

*N*-Boc-Thr[(N<sup>α</sup>-Cbz-N<sup>γ</sup>-4,4-dimethoxybenzhydryl)-Asn-D-Ala]-[(4*S*)-4-amino-3-oxo-2-triphenylphosphoranylidene-heptanoyl]-Leu-OBn (7)

A solution of 6 (4.24g, 3.75 mmol) in 80 mL of DMF was treated with 20 mL of piperidine. The resulting mixture was stirred at 23 °C for 1 h under N<sub>2</sub> atmosphere. The reaction mixture was poured onto 200 mL of water and extracted with EtOAc (3 x 200 mL). The combined organic layers were washed with 200 mL of saturated aqueous NaCl solution, dried (MgSO<sub>4</sub>), filtered, and concentrated *in vacuo*. The residue was chromatographed (SiO<sub>2</sub>, 6 x 20 cm) by first eluting with EtOAc followed by 10% Et<sub>3</sub>N/EtOAc elution to yield free amine as an off-white foam which was used immediately in the next reaction.

A solution of the free amine and N<sup>α</sup>-Cbz-N<sup>γ</sup>-Mbh-Asn-OH (1.84 g, 3.74 mmol) in 40 mL of DMF was sequentially treated with Et<sub>3</sub>N (1.04 mL, 7.48 mmol), HOBt (0.505 g, 3.74 mmol), and EDCI (

0.718 g, 3.74 mmol). The reaction mixture was stirred at 0 °C for 2 h under N<sub>2</sub> atmosphere, and allowed to warm to 23 °C and stirred for additional 16 h. The reaction mixture was poured onto 200 mL of water and extracted with EtOAc (3 x 250 mL). The combined organic layers were washed with saturated aqueous NaCl solution (300 mL), dried (MgSO<sub>4</sub>), filtered, and concentrated *in vacuo*. Flash chromatography (SiO<sub>2</sub>, 8 x 20 cm, 50-70% EtOAc/hexane gradient elution) of the crude product afforded pentadepsipeptide (7) 4.40 g (85 % as a white foam):  $[\alpha]^{20}_D = -2.9$  (C 20, CHCl<sub>3</sub>); Rf 0.35 (SiO<sub>2</sub>, EtOAc: hexane = 2:1); <sup>1</sup>H NMR (DMSO-d<sub>6</sub>, 500 MHz)  $\delta$  9.08 (br, s, 1 H), 8.59 (d, J = 8.4 Hz, 1 H), 8.20 (m, 2 H), 7.57-7.30 (m, 26 H), 7.16 (dd, J = 8.4, 3.3 Hz, 4 H), 6.95 (d, J = 8.9 Hz, 1 H), 6.85 (d, J = 8.4 Hz, 2 H), 6.82 (d, J = 8.4 Hz, 2 H), 6.00 (d, J = 8.4 Hz, 1 H), 5.05 (m, 6 H), 4.48 (m, 1 H), 4.34 (m, 1 H), 4.27 (m, 1 H), 4.22 (t, d = 7.1 Hz, 1 H), 3.70 (s, 3 H), 3.68 (s, 3 H), 2.58 (m, 2 H), 1.55 (m, 1 H), 1.47 (m, 1 H), 1.38 (s, 9 H), 1.23-1.15 (m, 10 H), 0.86 (d, J = 6.1 Hz, 3 H), 0.72 (d, J = 5.1 Hz, 3 H), 0.65 (d, J = 5.2 Hz, 3 H), 0.61 (br, s, 3 H); <sup>13</sup>C NMR (DMSO-d<sub>6</sub>, 125 MHz)  $\delta$  186.7, 172.7, 171.7, 171.0, 168.1, 158.1, 158.0, 155.7, 155.2, 136.9, 135.9, 134.9, 134.7, 132.8 (d, J<sub>c-p</sub> = 9.6 Hz), 131.7, 128.6, 128.4, 128.3, 127.9, 127.8, 127.7, 127.6, 125.9 (d, J<sub>c-p</sub> = 92.4 Hz), 113.6, 113.5, 78.4, 73.7 (d, J<sub>c-p</sub> = 104.0 Hz), 71.2, 65.7, 65.5, 57.6, 55.0, 54.9, 51.6, 50.7, 47.8, 40.6, 37.9, 28.1, 24.2, 23.8, 22.9, 22.7, 22.2, 21.3, 17.0, 16.8; IR (KBr)  $\nu$  max 3300, 3070, 2958, 1742, 1717, 1659, 1518, 1250, 1182 cm<sup>-1</sup>; HRMS calcd for (M+H)<sup>+</sup> 1383.6358. Found: 1383.6328.

[N-Boc-Thr-[(4S)-4-amino-3-oxo-2-triphenylphosphoranylidene-heptanoyl]-Leu-[(N<sup>γ</sup>-4,4-dimethoxybenzhydryl)-Asn]-D-Ala] (Threonine Hydroxyl) Lactone (8).

A solution of pentadepsipeptide 7 (3.50 g, 2.53 mmol) in 50 mL of CH<sub>3</sub>OH was treated with 10% Pd-C (400 mg) and the resulting black suspension was stirred at 23 °C under H<sub>2</sub> (1 atm) for 24 h. The catalyst was removed by filtration through celite and the filtrate was concentrated *in vacuo* to give the crude amino acid which was used directly in the next reaction without further purification.

A solution of the above product and NaHCO<sub>3</sub> (217 mg, 2.58 mmol) in 500 mL of degassed DMF was cooled to 0 °C and treated with diphenyl phosphoryl azide (DPPA) (2.30 mL, 10.7 mmol). The reaction mixture was stirred at 0 °C for 72 h. The reaction mixture was concentrated *in vacuo*, and the

residue was diluted with 250 mL of EtOAc. The organic phase was washed with H<sub>2</sub>O (150 mL) and saturated aqueous NaCl (150 mL), dried (MgSO<sub>4</sub>), filtered and concentrated *in vacuo*. Flash chromatography (SiO<sub>2</sub>, 5 x 20 cm, 3:1 to 4:1 EtOAc-hexane gradient eluent) afforded **8** (1.70 g, 59%) as a white powder:  $[\alpha]_D^{20} = +48.0$  (C 10.0, CHCl<sub>3</sub>); Rf 0.28 (4:1 EtOAc-hexane);

<sup>1</sup>H NMR (CDCl<sub>3</sub>, 500 MHz)  $\delta$  7.89-7.78 (m, 7 H), 7.52-7.36 (m, 10 H), 7.02 (m, 1 H), 6.98 (d, J = 8.3 Hz, 2 H), 6.89 (d, J = 8.3 Hz, 2 H), 6.75 (m, 4 H), 6.41 (d, J = 7.0 Hz, 1 H), 6.12 (m, 1 H), 5.67 (d, J = 8.2 Hz, 1 H), 5.61 (d, J = 8.3 Hz, 1 H), 5.38 (m, 1 H), 4.71 (m, 1 H), 4.62 (m, 1 H), 4.15 (m, 1 H), 4.10 (d, J = 8.1 Hz, 1 H), 3.97 (m, 1 H), 3.73 (s, 6 H), 3.04 (dd, J = 14.9, 3.8 Hz, 1 H), 2.32 (m, 1 H), 1.58 (m, 1 H), 1.41 (s, 9 H), 1.38-1.09 (m, 8 H), 0.95 (d, J = 6.2 Hz, 3 H), 0.88 (m, 6 H), 0.72 (d, J = 6.2 Hz, 3 H), 0.68 (d, J = 6.2 Hz, 3 H); <sup>13</sup>C (CDCl<sub>3</sub>, 125 MHz)  $\delta$  196.6, 172.9, 170.7, 169.6, 167.6, 158.6, 158.5, 155.7, 134.3, 133.8 (d, J<sub>c-p</sub> = 9.9 Hz), 135.5, 132.1, 128.9 (d, J<sub>c-p</sub> = 12.6 Hz), 128.6, 128.3, 125.9 (d, J<sub>c-p</sub> = 91.8 Hz), 113.8, 113.5, 79.4, 71.6, 71.5 (d, J = 101.5 Hz), 57.2, 55.1, 54.8, 53.9, 53.3, 49.6, 47.4, 44.6, 40.1, 35.9, 28.2, 25.2, 24.7, 23.2, 22.8, 22.6, 20.9, 18.8, 16.2; IR (KBr)  $\nu$  max 3428, 3059, 2955, 1672, 1510, 1248, 1175 cm<sup>-1</sup>; HRMS calcd for (M+H)<sup>+</sup> 1141.5415. Found: 1141.5402.

*N*-[*N*-(phenylacetyl)-Phe-Thr]-Thr-[(4*S*)-4-amino-3-oxo-2-triphenylphosphoranylidene-heptanoyl]-Leu-Asn-D-Ala] (Threonine Hydroxyl) Lactone (**9a**, YM-47141 precursor).

A mixture of the cyclopentadepsipeptide **8** (245 mg, 0.215 mmol) and anisole (0.5 mL) was treated with trifluoroacetic acid (5 mL). The resulting mixture was stirred at 23 °C for 3 h. The volatiles were removed *in vacuo*. The residue was triturated with Et<sub>2</sub>O (10 mL) and collected by filtration to give a white powder which was used directly in the following reaction without further purification.

A solution of the above salt in 5 mL of CH<sub>2</sub>Cl<sub>2</sub> was sequentially treated with *N*-phenylacetyl-Phe-Thr-OH (165 mg, 0.43 mmol), HOBt (58 mg, 0.43 mmol), Et<sub>3</sub>N (109 mg, 1.07 mmol), and EDCI (82.4 mg, 0.43 mmol). The resulting mixture was stirred at 23 °C for 36 h. The solution was then diluted with CH<sub>2</sub>Cl<sub>2</sub> (30 mL) and washed with H<sub>2</sub>O (15 mL) and saturated aqueous NaCl (15 mL). The organic layer was dried (MgSO<sub>4</sub>), filtered, and concentrated *in vacuo*. The residue was purified on a



chromatotron plate (coated with 6 mm thickness silica gel-gypsum, 10 % EtOH-CHCl<sub>3</sub> eluent) to yield 222 mg of **9a** (87%) as a white powder:  $[\alpha]_D^{20} = -40.1$  (C 4.0, CHCl<sub>3</sub>); Rf 0.4 (SiO<sub>2</sub>, 10% CH<sub>3</sub>OH-CHCl<sub>3</sub>);

<sup>1</sup>H NMR (DMSO-d<sub>6</sub>, 500 MHz)  $\delta$  9.39 (br, s, 1 H), 8.31 (m, 3 H), 7.80-7.03 (m, 25 H), 6.85 (br, s, 1 H), 5.64 (br, s, 1 H), 5.59 (m, 1 H), 5.44 (m, 1 H), 5.15 (d, J = 4.1 Hz, 1 H), 4.73 (m, 2 H), 4.46-4.40 (m, 3 H), 4.25 (m, 1 H), 4.10 (m, 1 H), 4.02 (m, 1 H), 3.91 (m, 1 H), 3.40 (d, J = 14.0 Hz, 1 H), 3.33 (d, J = 14.0 Hz, 1 H), 3.13 (d, J = 12.0 Hz, 1 H), 2.78 (m, 2 H), 2.55 (dd, J = 15.6, 4.6 Hz, 1 H), 2.44 (dd, J = 15.3, 6.4 Hz, 1 H), 1.47 (m, 3 H), 1.35 (d, J = 6.7 Hz, 3 H), 1.27 (m, 1 H), 1.18 (m, 4 H), 1.04 (d, J = 5.7 Hz, 3 H), 1.01 (m, 2 H), 0.83 (m, 5 H), 0.67 (d, J = 5.7 Hz, 3 H), 0.64 (d, J = 5.7 Hz, 3 H); <sup>13</sup>C (DMSO-d<sub>6</sub>, 125 MHz)  $\delta$  192.7, 172.7, 172.0, 171.8, 170.3, 170.0, 169.9, 169.7, 168.2, 166.5, 138.0, 136.2, 133.5, 133.4 (d, J<sub>c-p</sub> = 9.2 Hz), 132.1, 129.4, 128.9, 128.8, 128.0, 127.9, 126.1, 125.8 (d, J<sub>c-p</sub> = 87.8 Hz), 79.2, 71.8, 70.9 (d, J<sub>c-p</sub> = 104.0 Hz), 66.3, 57.9, 54.9, 53.9, 52.6, 49.5, 47.6, 43.4, 42.1, 40.2, 37.6, 35.6, 24.4, 23.9, 23.3, 22.8, 22.4, 21.9, 19.2, 18.2, 16.6;

IR (KBr)  $\nu$  max 3308, 3061, 3032, 2955, 1743, 1662, 1522 cm<sup>-1</sup>; HRMS calcd for (M+H)<sup>+</sup> 1181.5477, found 1181.5472.

#### YM-47141 (**1a**)

A solution of **9a** (0.20 g, 0.169 mmol) in 10 mL of CH<sub>2</sub>Cl<sub>2</sub> was ozonized at -78 °C for 2 min. The light-blue reaction mixture was purged with O<sub>2</sub> and N<sub>2</sub> for 3 and 5 min, respectively, to remove excess O<sub>3</sub>. During ozonolysis, the product precipitated out of the reaction solution. Filtration and washing the residue with CH<sub>2</sub>Cl<sub>2</sub> provided 0.144 g (89%) of YM-47141 as a white powder identical in all respects with a sample of natural material.  $[\alpha]_D^{20} = -8.6$  (C 0.3, CH<sub>3</sub>CN). (lit.  $[\alpha]_D^{25} = -10.1$  (C 0.2, CH<sub>3</sub>CN));

<sup>1</sup>H NMR (DMSO-d<sub>6</sub>, 500 MHz)  $\delta$  8.49 (d, J = 8.8 Hz, 1 H), 8.38 (d, J = 8.3 Hz, 1 H), 8.11 (d, J = 7.3 Hz, 1 H), 7.99 (d, J = 7.8 Hz, 1 H), 7.90 (d, J = 6.8 Hz, 1 H), 7.57 (d, J = 9.3 Hz, 1 H), 7.54 (s, 1 H), 7.35 (s, 1 H), 7.33 (s, 1 H), 7.30 (m, 2 H), 7.21 (m, 2 H), 7.16 (m, 4 H), 7.02 (m,

<sup>1</sup>H), 6.98 (d, J = 9.8 Hz, 1 H), 6.95 (s, 1), 5.42 (m, 1 H), 5.10 (d, J = 4.9 Hz, 1 H), 5.00 (m, 1 H), 4.69 (m, 1 H), 4.64 (dd, J = 9.3, 2.4 Hz, 1 H), 4.46 (m, 1 H), 4.41 (m, 1 H), 4.36 (dd, J = 8.8, 2.9 Hz, 1 H), 4.13 (m, 1 H), 4.02 (m, 1 H), 3.35 (d, J = 13.7 Hz, 1 H), 3.30 (d, J = 13.7 Hz, 1 H), 3.10 (dd, J = 13.7, 2.4 Hz, 1 H), 2.75 (dd, J = 13.7, 11.2 Hz, 1 H), 2.60 (dd, J = 15.6, 3.4 Hz, 1 H), 2.38 (dd, J = 15.6, 10.2 Hz, 1 H), 2.16 (m, 1 H), 1.61 (m, 2 H), 1.54 (m, 1 H), 1.43 (m, 1 H), 1.31 (m, 1 H), 1.13 (d, J = 6.3 Hz, 3 H), 1.03 (d, J = 6.3 Hz, 3 H), 1.00 (d, J = 6.8 Hz, 3 H), 0.89 (d, J = 6.3 Hz, 3 H), 0.87 (d, J = 6.4 Hz, 3 H), 0.85 (d, J = 6.3 Hz, 3 H), 0.81 (d, J = 6.4 Hz, 3 H); <sup>13</sup>C NMR (DMSO-d<sub>6</sub>, 125 MHz) δ 206.3, 172.2, 170.9, 170.6, 170.5, 170.4, 170.1, 170.0, 167.6, 138.1, 136.3, 129.5, 129.0, 128.1, 127.9, 126.2, 94.7, 71.9, 66.3, 57.9, 54.6, 54.1, 53.7, 53.3, 50.4, 46.7, 42.1, 38.6, 37.8, 36.8, 24.9, 24.1, 23.6, 22.7, 22.0, 20.7, 20.0, 16.5, 16.1 IR (KBr) ν<sub>max</sub> 3400, 3067, 2960, 1737, 1662, 1528 cm<sup>-1</sup>; HRMS calcd for (M+Na)<sup>+</sup> 975.4440, found 975.4435.

*N*-[*N*-(Isopropylacetyl)-Phe-Thr]-[(4*S*)-4-amino-3-oxo-2-triphenylphosphoranylidene-heptanoyl]-Leu-Asn-D-Ala] (Threonine Hydroxyl) Lactone (**9b**, YM-47142 precursor)

A mixture of the cyclopentadepsipeptide **8** (0.49 g, 0.429 mmol) and anisole (1 mL) was treated with trifluoroacetic acid (8 mL). The resulting solution was stirred for 2 h at rt and then was evaporated *in vacuo*. The residue was washed with ethyl ether (15 x 2 mL) to give a white powder which was used directly in the following reaction without further purification.

A solution of the above salt in 10 mL of CH<sub>2</sub>Cl<sub>2</sub> was treated with *N*-isopropylacetyl-Phe-Thr-OH (0.30 g, 0.857 mmol), HOBt (0.12 g, 0.888 mmol), Et<sub>3</sub>N (0.30 mL, 2.15 mmol) and EDCI (0.16 g, 0.835 mmol). The resulting mixture was stirred for 40 h at rt and then was diluted with CH<sub>2</sub>Cl<sub>2</sub> (20 mL) and washed with water (20 x 2 mL) and brine (20 mL). The organic layer was dried over Na<sub>2</sub>SO<sub>4</sub> and concentrated *in vacuo*. The residue was purified on a chromatotron (EtOH/CHCl<sub>3</sub> = 1:9) to give 0.35 g (72%) of expected product **9b** as a white powder. [α]<sub>D</sub><sup>20</sup> = -32.4 (C 5.0, CHCl<sub>3</sub>);

<sup>1</sup>H NMR (DMSO-d<sub>6</sub>, 500 MHz) δ 9.38 (br, s, 1 H), 8.14 (d, J = 8.3 Hz, 1 H), 8.02 (d, J = 7.8 Hz, 1 H), 7.78-7.14 (m, 23 H), 6.82 (br, s, 1 H), 5.67 (m, 1 H), 5.49 (m, 1 H), 5.41 (m, 1 H), 5.13 (d, J = 3.9 Hz, 1 H), 5.02 (m, 1 H), 4.67 (m, 2 H), 4.42 (m, 3 H), 4.09 (m, 1 H), 3.93 (m, 1 H),

3.08 (d,  $J = 13.2$  Hz, 1 H), 2.72 (m, 2 H), 2.54 (m, 1 H), 2.40 (m, 1 H), 1.85 (m, 2 H), 1.79 (m, 1 H), 1.44 (m, 3 H), 1.32 (d,  $J = 6.3$  Hz, 3 H), 1.16 (m, 6 H), 1.03 (d,  $J = 5.4$  Hz, 3 H), 1.00 (m, 1 H), 0.93 (m, 1 H), 0.80 (m, 6 H), 0.71 (d,  $J = 6.3$  Hz, 3 H), 0.65 (d,  $J = 5.9$  Hz, 3 H), 0.63 (d,  $J = 6.3$  Hz, 3 H);  $^{13}\text{C}$  NMR (DMSO- $d_6$ , 125 MHz)  $\delta$  192.5, 172.6, 172.1, 171.4, 170.2, 169.9, 169.8, 169.6, 168.2, 166.4, 138.2, 133.4 (d,  $J_{\text{c-p}} = 9.4$  Hz), 132.0, 129.2, 128.8, 127.8, 126.0, 125.7 (d,  $J_{\text{c-p}} = 81.0$  Hz), 71.7, 70.9 (d,  $J_{\text{c-p}} = 106.1$  Hz), 66.2, 57.7, 54.9, 53.6, 52.5, 52.2, 49.5, 47.6, 44.5, 39.9, 38.9, 37.3, 35.6, 25.4, 24.4, 23.8, 23.3, 22.8, 22.2, 22.1, 22.0, 20.8, 19.1, 18.1, 16.5. IR (KBr)  $\nu_{\text{max}}$  3289, 3016, 2952, 1661, 1519  $\text{cm}^{-1}$ ; HRMS calcd for  $(\text{M}+\text{H})^+$  1147.5633, found 1147.5641.

#### YM-47142 (1b)

A solution of YM-47142 precursor **9b** (0.30 g, 0.262 mmol) in 10 mL of  $\text{CH}_2\text{Cl}_2$  was ozonized at  $-78^\circ\text{C}$  for 2 min and then was purged with  $\text{N}_2$ . During ozonolysis, the product precipitated out of the reaction solution. Filtration and washing the residue with  $\text{CH}_2\text{Cl}_2$  provided 0.22 g (92%) of YM-47142 (**1b**) as a white powder identical with the authentic natural product.  $[\alpha]_{\text{D}}^{20} = -2.0$  (C 0.2,  $\text{CH}_3\text{CN}$ ) (lit.  $[\alpha]_{\text{D}}^{25} = -1.8$  (0.5,  $\text{CH}_3\text{CN}$ ));

$^1\text{H}$  NMR (DMSO- $d_6$ , 500 MHz)  $\delta$  8.35 (d,  $J = 8.8$  Hz, 1 H), 8.10 (d,  $J = 7.8$  Hz, 1 H), 8.07 (d,  $J = 8.3$  Hz, 1 H), 7.99 (d,  $J = 8.3$  Hz, 1 H), 7.90 (d,  $J = 6.8$  Hz, 1 H), 7.57 (d,  $J = 8.8$  Hz, 1 H), 7.53 (s, 1 H), 7.35 (s, 1 H), 7.32 (m, 2 H), 7.30 (s, 1 H), 7.21 (m, 2 H), 7.13 (m, 1 H), 6.98 (d,  $J = 9.3$  Hz, 1 H), 6.94 (s, 1 H), 5.41 (m, 1 H), 5.09 (d,  $J = 4.9$  Hz, 1 H), 5.00 (m, 1 H), 4.69 (m, 1 H), 4.62 (dd,  $J = 8.8, 2.0$  Hz, 1 H), 4.46 (m, 1 H), 4.41 (m, 1 H), 4.35 (dd,  $J = 8.3, 2.9$  Hz, 1 H), 4.14 (m, 1 H), 4.02 (m, 1 H), 3.06 (dd,  $J = 13.2, 2.4$  Hz, 1 H), 2.71 (dd,  $J = 13.2, 11.7$  Hz, 1 H), 2.60 (dd,  $J = 15.6, 3.4$  Hz, 1 H), 2.38 (dd,  $J = 15.6, 10.2$  Hz, 1 H), 2.15 (m, 1 H), 1.85 (m, 2 H), 1.80 (m, 1 H), 1.60 (m, 1 H), 1.59 (m, 1 H), 1.53 (m, 1 H), 1.44 (m, 1 H), 1.30 (m, 1 H), 1.13 (d,  $J = 6.3$  Hz, 3 H), 1.03 (d,  $J = 5.9$  Hz, 3 H), 1.00 (d,  $J = 7.3$  Hz, 3 H), 0.88 (d,  $J = 6.8$  Hz, 3 H), 0.86 (d,  $J = 6.8$  Hz, 3 H), 0.85 (d,  $J = 6.8$  Hz, 3 H), 0.81 (d,  $J = 6.3$  Hz, 3 H), 0.71 (d,  $J = 6.4$  Hz, 3 H), 0.62 (d,  $J = 6.8$  Hz, 3 H);  $^{13}\text{C}$  NMR (DMSO- $d_6$ , 125 MHz),  $\delta$  206.4, 172.5, 172.4, 171.7, 171.1, 170.7, 170.6, 170.5, 170.2, 167.6, 138.4, 129.5, 128.1, 126.3, 94.7, 72.0, 66.4,

57.9, 54.7, 54.0, 53.8, 53.4, 50.5, 46.8, 44.6, 40.0, 38.7, 37.6, 36.8, 25.7, 25.0, 24.2, 23.7,

22.8, 22.3, 22.2, 22.0, 20.8, 19.7, 16.6, 16.2. IR (KBr)  $\nu$  max 3299, 2959, 1651, 1532  $\text{cm}^{-1}$ ;

HRMS calcd for  $(\text{M}+\text{H})^+$  919.4776, found 919.4779.
